# Supplementary material
Source: PubMed Central journal article supplement (PMC6058326)
Supplement: supp_the2017-0481_onco12395-sup-0001-suppinfo01.pdf [file supp_the2017-0481_onco12395-sup-0001-suppinfo01.pdf]

Supplemental Figure for:  
Costs of cancer care across the disease continuum  
Deborah Kaye et al.

**Figure S1:** Example patient attribution over the cancer care continuum

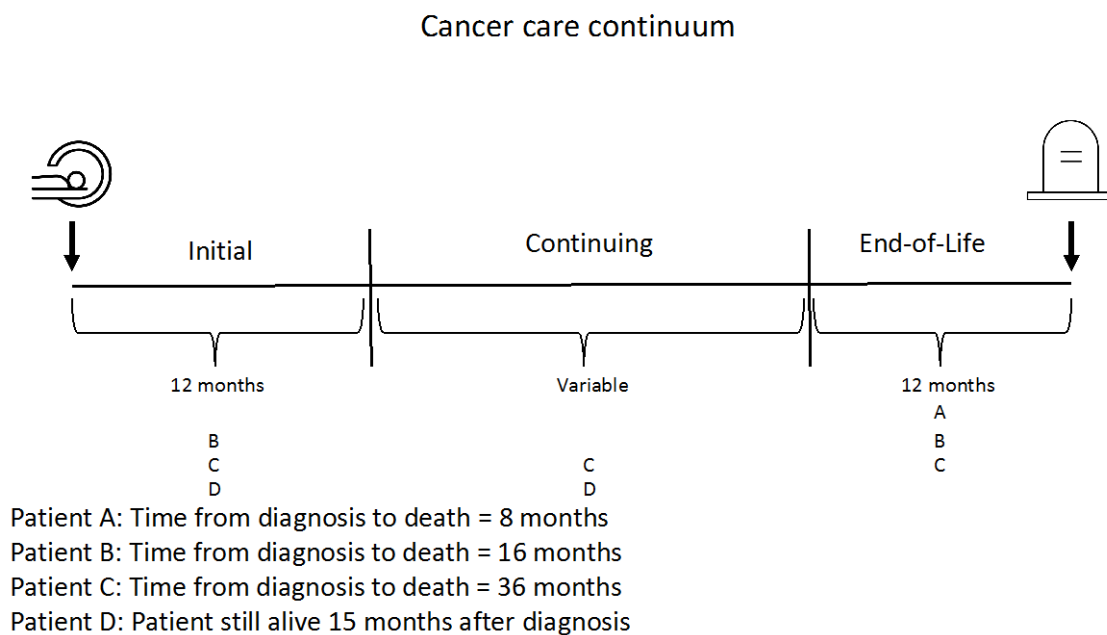

Supplemental Figure for:  
Costs of cancer care across the disease continuum  
Deborah Kaye et al.

Appendix Figure 2: Total average payments, by age

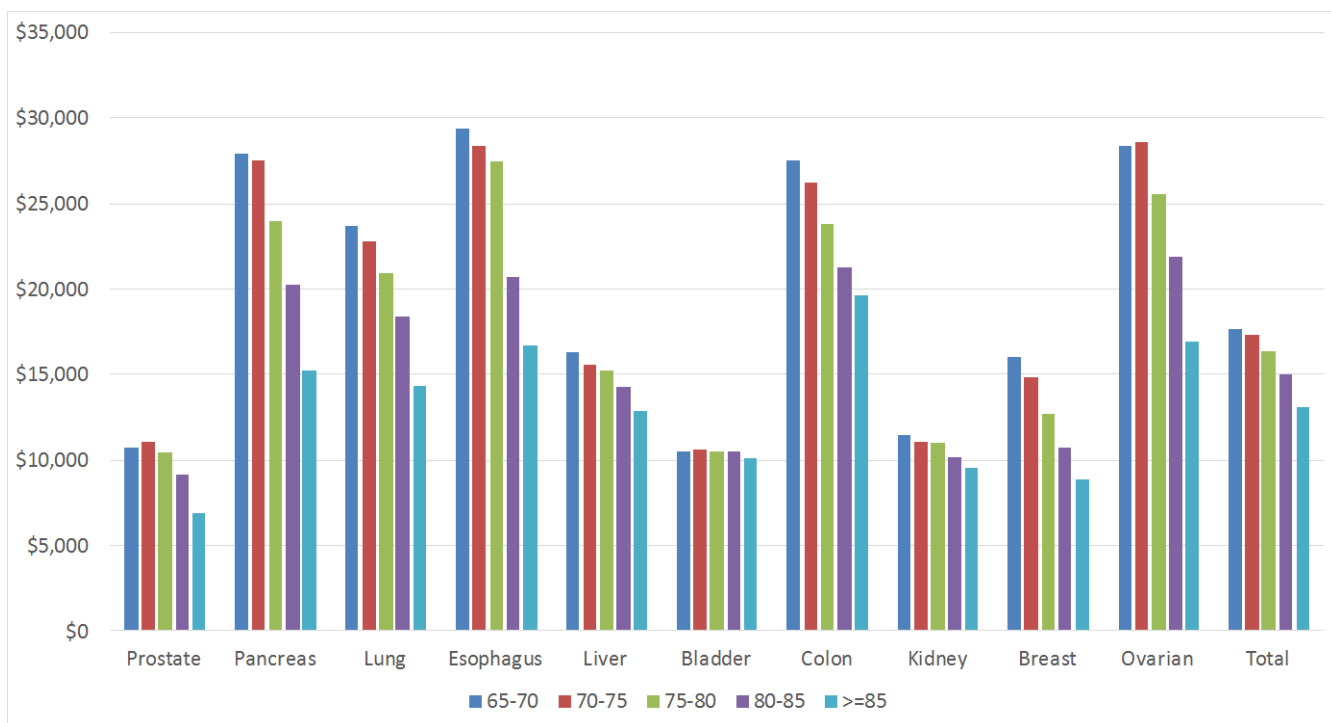

Supplemental Figure for:  
Costs of cancer care across the disease continuum  
Deborah Kaye et al.

Appendix Figure 3: Overall annual payments for cancer care, by geographic region

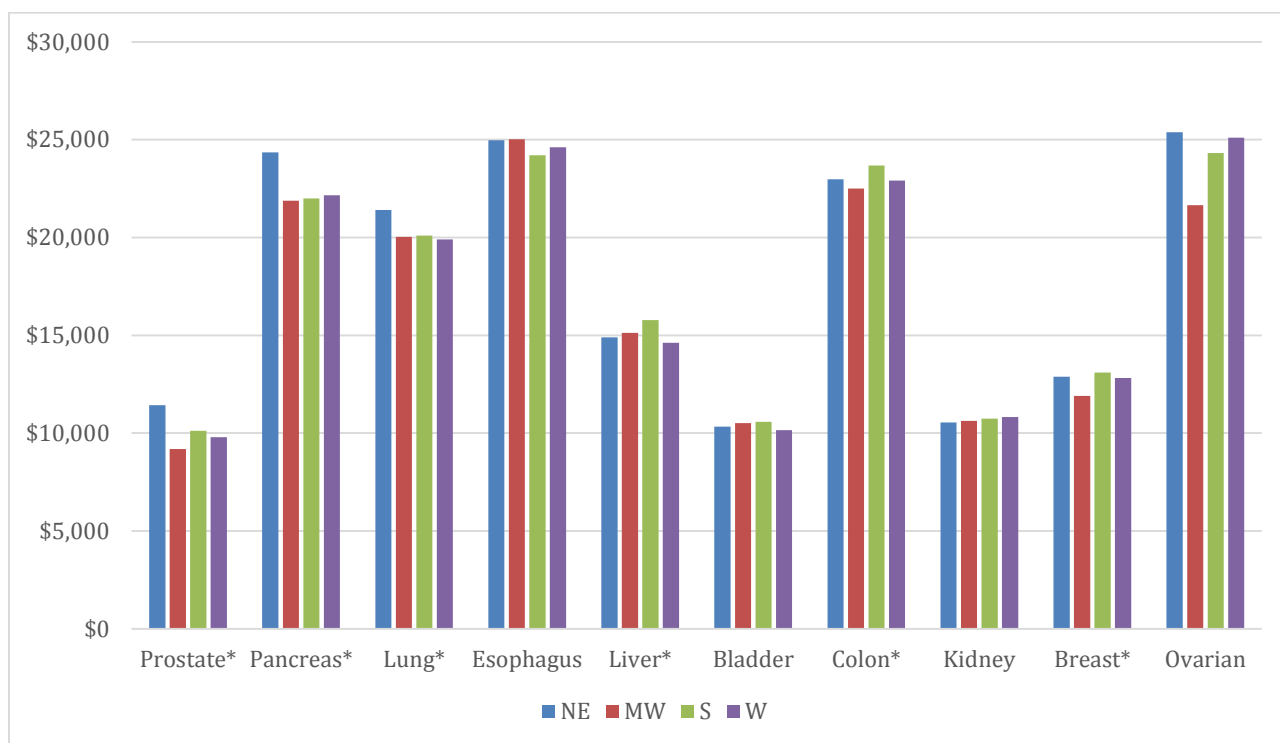

\*  $p < 0.05$
