# Supplementary material
Source: PubMed Central journal article supplement (PMC6058326)
Supplement: supp_the2017-0481_onco12395-sup-0002-suppinfo02.pdf [file supp_the2017-0481_onco12395-sup-0002-suppinfo02.pdf]

Supplemental Table for:  
Costs of cancer care across the disease continuum  
Deborah Kaye et al.

Table S1: Overall annual payments for cancer care, by stage at diagnosis

|             | I        | II       | III      | IV       |
|-------------|----------|----------|----------|----------|
| Prostate*   | \$1,426  | \$9,847  | \$12,937 | \$15,035 |
| Pancreas*   | \$23,475 | \$34,488 | \$28,395 | \$16,703 |
| Lung*       | \$19,645 | \$26,869 | \$23,821 | \$19,199 |
| Esophagus*  | \$20,512 | \$30,688 | \$33,083 | \$22,034 |
| Liver*      | \$16,048 | \$18,160 | \$17,173 | \$11,428 |
| Bladder*    | \$6,980  | \$19,902 | \$26,059 | \$24,465 |
| Colorectal* | \$13,758 | \$20,585 | \$29,480 | \$35,609 |
| Kidney*     | \$8,553  | \$11,174 | \$14,356 | \$15,802 |
| Breast*     | \$10,165 | \$14,948 | \$22,229 | \$21,886 |
| Ovarian*    | \$14,830 | \$22,016 | \$29,628 | \$25,642 |

\* p < 0.05
